# Supplementary material for: Multi-Spheres Adsorptive Microextraction (MSAμE)—Application of a Novel Analytical Approach for Monitoring Chemical Anthropogenic Markers in Environmental Water Matrices
Source: Molecules. 2019 Mar 7;24(5):931. doi: 10.3390/molecules24050931 (PMC6429196; doi:10.3390/molecules24050931)
Supplement: Supplementary file 1 [file molecules-24-00931-s001.pdf]

Supplementary data

**Table S1.** Nanotextural and chemical characteristics of the commercial ACs.

| AC              | pH <sub>PZC</sub> | A <sub>BET</sub> <sup>*</sup><br>cm <sup>3</sup> g <sup>-1</sup> | V <sub>total</sub> <sup>a</sup><br>cm <sup>3</sup> g <sup>-1</sup> | V <sub>meso</sub> <sup>b</sup><br>cm <sup>3</sup> g <sup>-1</sup> | α <sub>s</sub> method                                   |                                                         |                                                         |
|-----------------|-------------------|------------------------------------------------------------------|--------------------------------------------------------------------|-------------------------------------------------------------------|---------------------------------------------------------|---------------------------------------------------------|---------------------------------------------------------|
|                 |                   |                                                                  |                                                                    |                                                                   | V <sub>α total</sub><br>cm <sup>3</sup> g <sup>-1</sup> | V <sub>α ultra</sub><br>cm <sup>3</sup> g <sup>-1</sup> | V <sub>α super</sub><br>cm <sup>3</sup> g <sup>-1</sup> |
| R               | 6.5               | 937                                                              | 0.65                                                               | 0.36                                                              | 0.29                                                    | 0.10                                                    | 0.19                                                    |
| N               | 8.4               | 1065                                                             | 0.70                                                               | 0.30                                                              | 0.40                                                    | 0.02                                                    | 0.38                                                    |
| N <sub>ox</sub> | 5.5               | 875                                                              | 0.51                                                               | 0.14                                                              | 0.37                                                    | 0.00                                                    | 0.37                                                    |

<sup>a</sup> Volume adsorbed at p/p<sup>0</sup> = 0.95; <sup>b</sup> Difference between V<sub>total</sub> and V<sub>α total</sub>.

<sup>\*</sup> Specific surface area obtained by BET equation.

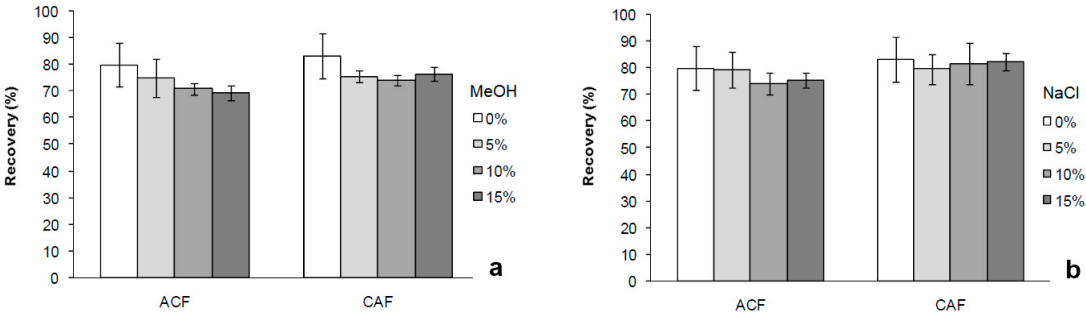

**Figure S1.** Effect of matrix polarity (a) and ionic strength (b) on the recovery of ACF and CAF by MSA $\mu$ E(AC(R))-LD/HPLC-DAD.

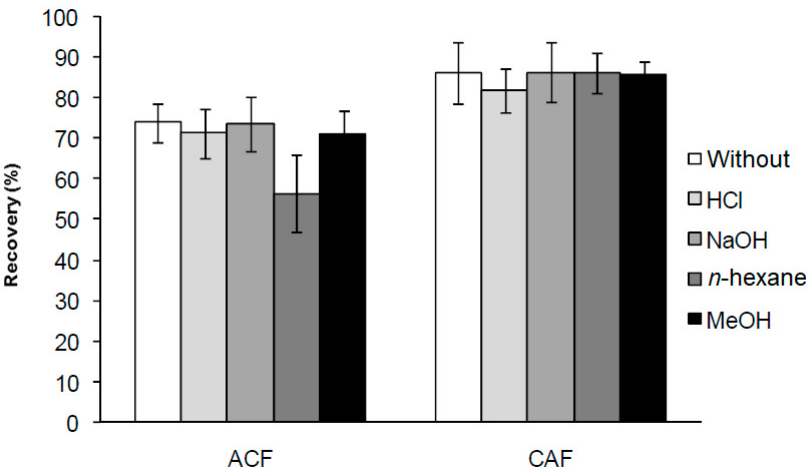

**Figure S2.** Evaluation of extraction capacity after immersing the devices in different solvents.
